# Supplementary material for: Mediating effects of self-stigma on the relationship between perceived stigma and psychosocial outcomes among psychiatric outpatients: findings from a cross-sectional survey in Singapore
Source: PubMed Central journal article supplement — BMJ Open. 2017 Aug 29;7(8):e018228. doi: 10.1136/bmjopen-2017-018228 (PMC5724097; doi:10.1136/bmjopen-2017-018228), 2017-08-29
Supplement: bmjopen-2017-018228supp001.pdf [file bmjopen-2017-018228supp001.pdf]

Supplementary Table 1: Controlled variables in individual mediation analyses

|                                        | <b>Self Esteem</b> | <b>Functioning</b> | <b>Physical Health</b> | <b>Psychological Health</b> | <b>Social Relationships</b> | <b>Environmental</b> |
|----------------------------------------|--------------------|--------------------|------------------------|-----------------------------|-----------------------------|----------------------|
| <b>Predictors</b>                      | $\beta$            | $\beta$            | $\beta$                | $\beta$                     | $\beta$                     | $\beta$              |
| <b>Total Sample</b>                    |                    |                    |                        |                             |                             |                      |
| Age                                    | 0.102              | -                  | 0.375                  | 0.357                       | 0.476                       | -                    |
| Age of Onset of Illness                | -                  | -                  | -                      | -0.269                      | -0.386                      | -0.280               |
| Employment - Unemployed                | -                  | -8.562             | -3.594                 | -                           | -                           | -                    |
| Employment – Student/Homemaker/Retired | -                  | -                  | -                      | -                           | 8.831                       | -                    |
| Ethnicity - Malay                      | -                  | -                  | -                      | -                           | 7.567                       | -                    |
| Education – Primary and below          | -                  | -                  | -                      | -                           | -                           | -12.616              |
| Education- Secondary, O/N Levels       | -                  | -                  | -                      | -                           | -                           | -4.518               |
| <b>Anxiety</b>                         |                    |                    |                        |                             |                             |                      |
| Age                                    | -                  | -                  | -                      | -                           | -                           | 0.930                |
| Employment - Unemployed                | -                  | -12.138            | -                      | -                           | -                           | -                    |
| Employment – Student/Homemaker/Retired | -                  | -                  | -                      | -                           | 19.975                      | -                    |
| Education – Secondary, O/N Levels      | -3.735             | -                  | -                      | -                           | -                           | -                    |
| Ethnicity - Indian                     | -                  | -                  | -                      | 10.927                      | -                           | -                    |
| <b>Depression</b>                      |                    |                    |                        |                             |                             |                      |
| Age                                    | -                  | -                  | 0.530                  | -                           | -                           | -                    |
| Employment - Unemployed                | -                  | -                  | -6.998                 | -                           | -                           | -                    |
| Education – Primary and below          | -                  | -                  | -                      | -                           | -                           | -17.465              |
| Education- Secondary, O/N Levels       | -                  | -                  | -                      | -                           | -                           | -14.420              |
| Gender - Female                        | -                  | 8.677              | -                      | -                           | -                           | -                    |
| Marital Status – Married               | -                  | 15.152             | -                      | -                           | -                           | -                    |
| <b>OCD</b>                             |                    |                    |                        |                             |                             |                      |
| Age                                    | 0.264              | -                  | -                      | 0.887                       | -                           | -                    |
| Age of onset                           | -0.273             | -                  | -                      | -0.771                      | -                           | -                    |
| <b>Schizophrenia</b>                   |                    |                    |                        |                             |                             |                      |
| Employment – Student/Homemaker/Retired | -                  | -18.639            | -                      | -                           | -                           | -                    |
| Education- Secondary, O/N Levels       | -                  | 9.399              | -                      | -                           | -                           | -                    |
| Education - University                 | -                  | 20.101             | -                      | -                           | -                           | -                    |
| Marital Status - Married               | -                  | -11.381            | -                      | -                           | -                           | -                    |
| Hospitalisation - Yes                  | -                  | 10.679             | -                      | -                           | -                           | -                    |

All  $\beta$  reported are significant at  $p < 0.05$ .

Reference category: Employment = Employed; Education = A level/ Diploma; Gender = male; Ethnicity = Chinese; Marital Status = Never married; Hospitalisation = No
